# Supplementary material for: Bioprospecting of a Metschnikowia pulcherrima Indigenous Strain for Chasselas Winemaking in 2022 Vintage
Source: MDPI journal article supplement (doi:10.3390/foods12244485), 2023-12-14
Supplement: s1 [file s1]

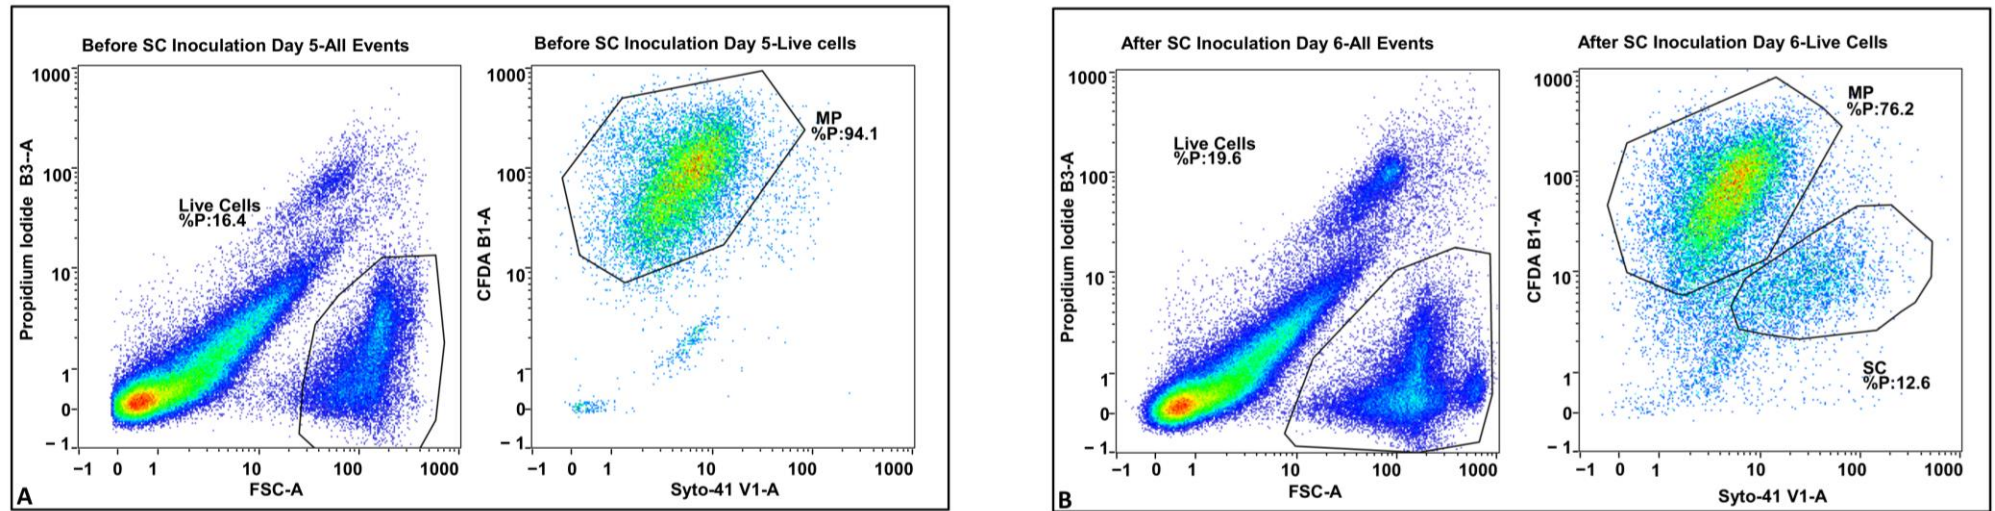

Figure S1. FCM gating strategy. Panel A (before *S. cerevisiae* (SC) inoculation). *M. pulcherrima* (MP) population analyzed by FCM on day 5 of laboratory-scale vinification. Panel B (after SC inoculation on day 5). In addition to the MP population, the population of *S. cerevisiae* is visible. Different colors indicate cell density (blue/green = low cell density; yellow/red = high cell density).
